# Supplementary material
Source: Springer Nature journal article supplement (https://www.springermedizin.de/resource/supplementary/13256_2010_1536_MOESM2_ESM.pdf/9647876)

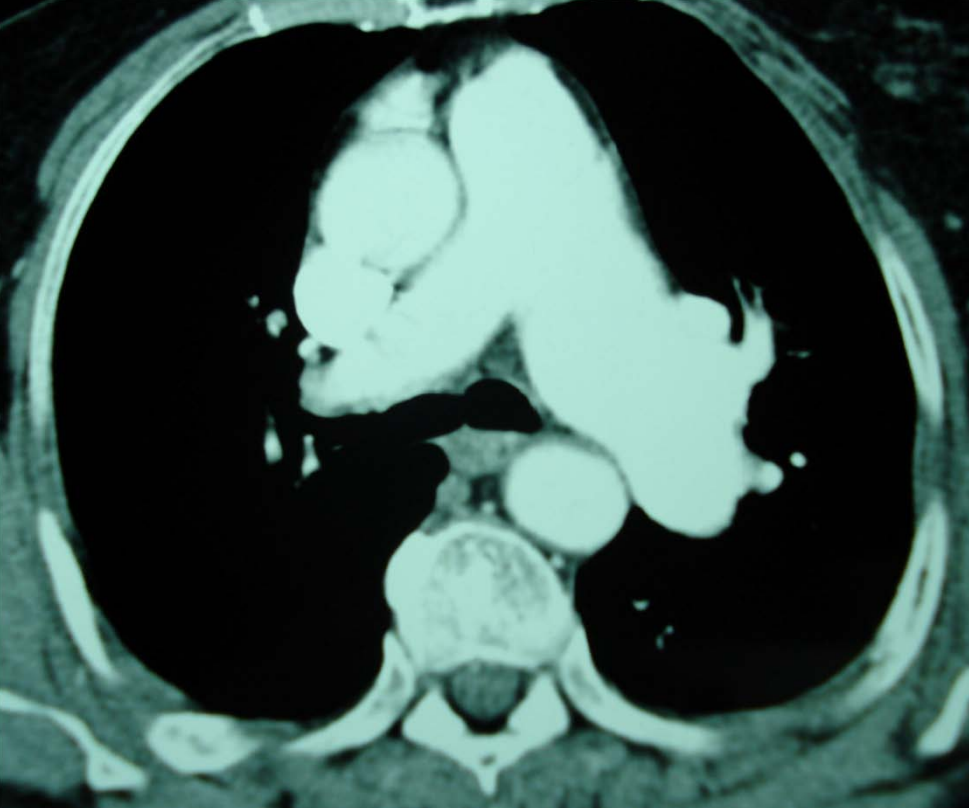

Supplement: MOESM2 [file 9647876]
